# Supplementary material for: Plasmalogens Mediate the Effect of Age on Bronchodilator Response in Individuals With Asthma
Source: Front Med (Lausanne). 2020 Feb 14;7:38. doi: 10.3389/fmed.2020.00038 (PMC7034309; doi:10.3389/fmed.2020.00038)
Supplement: Supplementary file 2 [file Table_1.xlsx]

## Sheet: Supplemental Table 1
Supplemental Table 1. Serum Metabolites in CAMP study
Metabolite	HMDB.ID	Method (Assay Platform)	Mass to Charge Ratio( m.z)	Retention Time (minutes)
2-hydroxyglutarate	HMDB0000694*	HIL-neg	147.03	7
3-methyladipate/pimelate	HMDB0000555*	HIL-neg	159.066	6.75
adipate	HMDB0000448	HIL-neg	145.051	6.8
alpha-hydroxybutyrate	HMDB0000008	HIL-neg	103.04	3.4
AMP	HMDB0000045	HIL-neg	346.056	7.65
citrate	HMDB0000094	HIL-neg	191.02	9
dCMP	HMDB0001202	HIL-neg	306.05	7.4
dUMP	HMDB0001409	HIL-neg	307.034	7.45
fructose/glucose/galactose	HMDB0000122*	HIL-neg	179.056	1.85
fumarate/maleate	HMDB0000134*	HIL-neg	115.004	7.05
glycocholate	HMDB0000138	HIL-neg	464.302	3.9
glycodeoxycholate/glycochenodeoxycholate	HMDB0000631*	HIL-neg	448.307	3.8
guanosine	HMDB0000133	HIL-neg	282.084	3
hippurate	HMDB0000714	HIL-neg	178.051	3.9
hypoxanthine	HMDB0000157	HIL-neg	135.031	3.4
indoxylsulfate	HMDB0000682	HIL-neg	212.002	3.8
inosine	HMDB0000195	HIL-neg	267.074	3.35
inositol	HMDB0000211	HIL-neg	179.056	2.7
isocitrate	HMDB0000193	HIL-neg	191.019	9.15
kynurenine	HMDB0000684	HIL-neg	207.077	3.15
lactate	HMDB0000190	HIL-neg	89.0244	3.85
malate	HMDB0000156	HIL-neg	133.014	6.95
malonate	HMDB0000691	HIL-neg	103.004	5
methylmalonate	HMDB0000202	HIL-neg	117.019	7.1
oxalate	HMDB0002329	HIL-neg	88.988	7.4
quinolinate	HMDB0000232	HIL-neg	166.015	7.45
salicylurate	HMDB0000840	HIL-neg	194.046	6.1
sebacate	HMDB0000792	HIL-neg	201.113	6.75
sorbitol	HMDB0000247	HIL-neg	181.072	2
suberate	HMDB0000893	HIL-neg	173.082	6.75
succinate	HMDB0000254	HIL-neg	117.019	6.9
sucrose	HMDB0000258	HIL-neg	341.108	2.2
taurocholate	HMDB0000036	HIL-neg	514.284	3.5
taurodeoxycholate/taurochenodeoxycholate	HMDB0000896*	HIL-neg	498.289	3.4
UMP	HMDB0000288	HIL-neg	323.029	7.55
uracil	HMDB0000300	HIL-neg	111.02	1.5
urate	HMDB0000289	HIL-neg	167.021	5.25
uridine	HMDB0000296	HIL-neg	243.062	1.75
xanthine	HMDB0000292	HIL-neg	151.026	4.95
xanthurenate	HMDB0000881	HIL-neg	204.03	8.3
1,7-dimethylurate	HMDB0011103	HIL-pos	197.067	3.42
1-methyladenosine	HMDB0003331	HIL-pos	282.119	7.6
1-methylguanine	HMDB0003282	HIL-pos	166.072	5.17
1-methylguanosine	HMDB0001563	HIL-pos	298.114	5.02
1-methylhistamine	HMDB0000898	HIL-pos	126.103	9.45
1-methylhistidine	HMDB0000001	HIL-pos	170.092	9.84
1-methylnicotinamide	HMDB0000699	HIL-pos	137.071	8.1
2-aminooctanoate	HMDB0000991	HIL-pos	160.133	6.41
2-methylguanosine	HMDB0005862	HIL-pos	298.114	5.19
2-O-methyladenosine	HMDB0004326	HIL-pos	282.119	4.57
3-(N-acetyl-L-cystein-S-yl) acetaminophen	N/A	HIL-pos	313.085	5.01
4-acetamidobutanoate	HMDB0003681	HIL-pos	146.081	3.34
4-aminohippuric acid	HMDB0001867	HIL-pos	195.076	2.4
4-hydroxy-3-methylacetophenone	HMDB0059824	HIL-pos	151.075	1.96
4-hydroxyhippurate	HMDB0013678	HIL-pos	196.06	2.67
4-pyridoxate	HMDB0000017	HIL-pos	184.06	4.15
5-hydroxytryptophol	HMDB0001855	HIL-pos	178.086	1.95
6,8-dihydroxypurine	HMDB0001182	HIL-pos	153.041	4.25
7-methylguanine	HMDB0000897	HIL-pos	166.072	5.66
7-methylxanthine	HMDB0001991	HIL-pos	167.056	3.55
8-hydroxy-deoxyguanosine	HMDB0003333	HIL-pos	284.099	5.2
acetaminophen	HMDB0001859	HIL-pos	152.071	1.98
acetyl-galactosamine	HMDB0000853	HIL-pos	222.097	5.35
ADMA	HMDB0001539	HIL-pos	203.15	9.66
alanine	HMDB0000161	HIL-pos	90.0548	7.78
allantoin	HMDB0000462	HIL-pos	159.051	3.44
alpha-glycerophosphocholine	HMDB0000086	HIL-pos	258.11	10.43
aminoisobutyric acid	HMDB0001906*	HIL-pos	104.07	7.69
arginine	HMDB0000517	HIL-pos	175.119	9.11
asparagine	HMDB0000168	HIL-pos	133.061	7.94
betaine	HMDB0000043	HIL-pos	118.086	8.89
bilirubin	HMDB0000054	HIL-pos	585.27	1.69
biliverdin	HMDB0001008	HIL-pos	583.255	1.96
butyrobetaine	HMDB0001161	HIL-pos	146.117	8.65
C10:2 carnitine	HMDB0013325	HIL-pos	312.216	7.29
C10 carnitine	HMDB0000651	HIL-pos	316.248	7.08
C12:1 carnitine	HMDB0013326	HIL-pos	342.264	6.94
C12 carnitine	HMDB0002250	HIL-pos	344.279	6.9
C14:1 carnitine	HMDB0002014	HIL-pos	370.295	6.78
C14:2 carnitine	HMDB0013331	HIL-pos	368.279	6.82
C14 carnitine	HMDB0005066	HIL-pos	372.31	6.78
C16:1 LPC plasmalogen	HMDB0010407	HIL-pos	480.344	7.6
C16 carnitine	HMDB0000222	HIL-pos	400.342	6.67
C18:1 carnitine	HMDB0005065	HIL-pos	426.357	6.58
C18:1 LPC plasmalogen	HMDB0013122*	HIL-pos	508.375	7.79
C18:1 LPC plasmalogen_minor	HMDB0013122*	HIL-pos	508.376	7.48
C18:2 carnitine	HMDB0006469	HIL-pos	424.341	6.63
C18 carnitine	HMDB0000848	HIL-pos	428.373	6.55
C22:5 LPC	HMDB0010403*	HIL-pos	570.355	7.62
C26 carnitine	HMDB0006347	HIL-pos	540.498	6.27
C2 carnitine	HMDB0000201	HIL-pos	204.123	8.57
C34:3 DAG or TAG fragment	N/A	HIL-pos	608.524	1.62
C36:2 DAG or TAG fragment	N/A	HIL-pos	638.572	1.61
C36:2 PS plasmalogen	N/A	HIL-pos	774.563	6.73
C36:3 DAG or TAG fragment	N/A	HIL-pos	636.556	1.62
C36:3 PS plasmalogen	N/A	HIL-pos	772.548	6.72
C36:4 DAG or TAG fragment	N/A	HIL-pos	634.54	1.62
C36:5 PC plasmalogen	HMDB0011220*	HIL-pos	766.574	6.47
C38:5 DAG or TAG fragment	N/A	HIL-pos	660.556	1.61
C3 carnitine	HMDB0000824	HIL-pos	218.138	8.21
C3-DC-CH3 carnitine	HMDB0013133	HIL-pos	262.128	8.53
C40:6 PE	HMDB0009012*	HIL-pos	792.553	5.41
C4 carnitine	HMDB0002013	HIL-pos	232.154	7.91
C4-OH carnitine	HMDB0013127	HIL-pos	248.149	8.77
C5:1 carnitine	HMDB0002366	HIL-pos	244.154	7.78
C5 carnitine	HMDB0000688	HIL-pos	246.17	7.68
C5-DC carnitine	HMDB0013130	HIL-pos	276.144	8.26
C6 carnitine	HMDB0000705	HIL-pos	260.185	7.47
C7 carnitine	HMDB0013238	HIL-pos	274.201	7.35
C8 carnitine	HMDB0000791	HIL-pos	288.216	7.28
C9 carnitine	HMDB0013288	HIL-pos	302.232	7.14
caffeine	HMDB0001847	HIL-pos	195.088	2.8
carnitine	HMDB0000062	HIL-pos	162.112	8.74
choline	HMDB0000097	HIL-pos	104.107	8.12
citrulline	HMDB0000904	HIL-pos	176.103	8.35
cortisol	HMDB0000063	HIL-pos	363.216	1.97
cortisone	HMDB0002802	HIL-pos	361.2	1.97
cotinine	HMDB0001046	HIL-pos	177.102	4.9
creatine	HMDB0000064	HIL-pos	132.077	8.28
creatinine	HMDB0000562	HIL-pos	114.066	6.39
cytosine	HMDB0000630	HIL-pos	112.05	6.07
diacetylspermine	HMDB0002172	HIL-pos	287.244	10.16
dimethylglycine	HMDB0000092	HIL-pos	104.07	8.49
DMGV	HMDB0240212	HIL-pos	202.118	7.92
ectoine	N/A	HIL-pos	143.081	8.86
GABA	HMDB0000112	HIL-pos	104.07	7.6
glutamate	HMDB0000148	HIL-pos	148.06	7.61
glutamine	HMDB0000641	HIL-pos	147.076	8.04
glycine	HMDB0000123	HIL-pos	76.0392	7.91
guanidoacetic acid	HMDB0000128	HIL-pos	118.061	7.83
histidine	HMDB0000177	HIL-pos	156.077	9.35
homoarginine	HMDB0000670*	HIL-pos	189.134	9.14
hydroxycotinine	HMDB0001390	HIL-pos	193.097	4.87
hydroxyectoine	N/A	HIL-pos	159.076	8.35
hydroxyproline	HMDB0000725	HIL-pos	132.065	7.87
hypotaurine	HMDB0000965	HIL-pos	110.027	7.98
isoleucine	HMDB0000172	HIL-pos	132.102	7.05
kynurenic acid	HMDB0000715	HIL-pos	190.05	5.24
L-alpha-glutamyllysine	HMDB0004207	HIL-pos	276.155	9.74
leucine	HMDB0000687	HIL-pos	132.102	6.92
linoleoyl ethanolamide	HMDB0012252	HIL-pos	324.289	1.97
lysine	HMDB0000182	HIL-pos	147.113	9.35
methionine	HMDB0000696	HIL-pos	150.058	7.02
methionine sulfoxide	HMDB0002005	HIL-pos	166.053	8.64
N1-acetylspermidine	HMDB0001276	HIL-pos	188.175	9.68
N1-methyl-2-pyridone-5-carboxamide	HMDB0004193	HIL-pos	153.066	4.2
N2,N2-dimethylguanosine	HMDB0004824	HIL-pos	312.13	5.28
N4-acetylcytidine	HMDB0005923	HIL-pos	286.103	4.15
N6-acetyllysine	HMDB0000206	HIL-pos	189.123	8.32
N6,N6-dimethyllysine	HMDB0013287	HIL-pos	175.144	10.17
N6,N6,N6-trimethyllysine	HMDB0001325	HIL-pos	189.16	11.12
N-acetylalanine	HMDB0000766	HIL-pos	132.065	3.81
N-acetylhistidine	HMDB0032055	HIL-pos	198.085	8.35
N-acetylputrescine	HMDB0002064	HIL-pos	131.118	7.82
N-acetyltryptophan	HMDB0013713	HIL-pos	247.108	2.82
N-alpha-acetylarginine	HMDB0004620	HIL-pos	217.129	8.12
N-carbamoyl-beta-alanine	HMDB0000026	HIL-pos	133.061	4.08
niacinamide	HMDB0001406	HIL-pos	123.055	3.64
N-methylproline	N/A	HIL-pos	130.086	8.54
NMMA	HMDB0029416	HIL-pos	189.134	9.31
oleoyl glycine	HMDB0013631	HIL-pos	340.284	2.26
ornithine	HMDB0000214	HIL-pos	133.097	9.25
pantothenate	HMDB0000210	HIL-pos	220.118	3.02
phenylacetylglutamine	HMDB0006344	HIL-pos	265.118	4.64
phenylalanine	HMDB0000159	HIL-pos	166.086	6.68
pipecolic acid	HMDB0000716	HIL-pos	130.086	7.91
piperine	HMDB0029377	HIL-pos	286.144	1.94
proline	HMDB0000162	HIL-pos	116.07	8.05
proline betaine	HMDB0004827	HIL-pos	144.102	9.13
pseudouridine	HMDB0000767	HIL-pos	245.077	4.12
pyridoxamine	HMDB0001431	HIL-pos	169.095	9.34
pyroglutamic acid	HMDB0000267	HIL-pos	130.05	6.72
ribothymidine	HMDB0000884	HIL-pos	259.092	2.87
SDMA	HMDB0003334	HIL-pos	203.15	9.56
serine	HMDB0000187	HIL-pos	106.05	7.66
serotonin	HMDB0000259	HIL-pos	177.102	6.21
sphinganine	HMDB0000269	HIL-pos	302.305	5.76
sphingosine	HMDB0000252	HIL-pos	300.289	1.97
taurine	HMDB0000251	HIL-pos	126.022	6.05
threonine	HMDB0000167	HIL-pos	120.065	7.61
threosphingosine	N/A	HIL-pos	300.289	5.65
thyroxine	HMDB0000248	HIL-pos	777.693	5.65
trigonelline	HMDB0000875	HIL-pos	138.055	8.8
trimethylamine-N-oxide	HMDB0000925	HIL-pos	76.0756	7.99
trimethylbenzene	HMDB0013733*	HIL-pos	121.101	1.74
tryptophan	HMDB0000929	HIL-pos	205.097	6.48
tyrosine	HMDB0000158	HIL-pos	182.081	6.79
valine	HMDB0000883	HIL-pos	118.086	7.36
C14:0 CE	HMDB0006725	C8-pos	619.542	11.48
C14:0 LPC	HMDB0010379	C8-pos	468.309	4.31
C14:0 SM	HMDB0012097	C8-pos	675.544	7.53
C14:1 MAG	HMDB0011562*	C8-pos	323.219	4.45
C16:0 CE	HMDB0000885	C8-pos	647.574	11.88
C16:0 Ceramide (d18:1)	HMDB0004949	C8-pos	538.52	8.18
C16:0 LPC	HMDB0010382	C8-pos	496.34	4.79
C16:0 LPE	HMDB0011503	C8-pos	454.293	4.8
C16:0 SM	HMDB0010169	C8-pos	703.575	8.04
C16:1 CE	HMDB0000658*	C8-pos	645.558	11.58
C16:1 LPC	HMDB0010383*	C8-pos	494.325	4.45
C16:1 MAG	HMDB0011565*	C8-pos	339.251	4.85
C16:1 SM	N/A	C8-pos	701.559	7.69
C18:0 CE	HMDB0010368	C8-pos	675.605	12.3
C18:0 LPC	HMDB0010384	C8-pos	524.371	5.33
C18:0 LPE	HMDB0011130	C8-pos	482.325	5.34
C18:0 MAG	HMDB0011131	C8-pos	381.297	5.75
C18:0 SM	HMDB0001348	C8-pos	731.606	8.53
C18:1 CE	HMDB0000918*	C8-pos	673.589	11.95
C18:1 LPC	HMDB0002815*	C8-pos	522.356	4.95
C18:1 LPE	HMDB0011506*	C8-pos	480.309	4.97
C18:1 SM	HMDB0012101*	C8-pos	729.591	8.21
C18:2 CE	HMDB0000610*	C8-pos	671.573	11.66
C18:2 LPC	HMDB0010386*	C8-pos	520.34	4.62
C18:2 LPE	HMDB0011507*	C8-pos	478.293	4.64
C18:2 SM	N/A	C8-pos	749.557	7.89
C18:3 CE	HMDB0010370*	C8-pos	669.558	11.41
C18:3 LPC	HMDB0010387*	C8-pos	518.322	4.66
C20:0 LPE	HMDB0011481	C8-pos	510.356	5.06
C20:0 SM	HMDB0012102	C8-pos	759.638	9.04
C20:3 CE	HMDB0006736*	C8-pos	697.589	11.79
C20:4 CE	HMDB0006726	C8-pos	695.573	11.53
C20:4 LPC	HMDB0010395	C8-pos	544.341	4.65
C20:4 LPE	HMDB0011517	C8-pos	502.293	4.66
C20:5 CE	HMDB0006731	C8-pos	693.558	11.27
C20:5 LPC	HMDB0010397	C8-pos	542.322	4.52
C22:0 Ceramide (d18:1)	HMDB0004952	C8-pos	622.614	9.54
C22:0 LPE	HMDB0011520	C8-pos	538.387	5.63
C22:0 SM	HMDB0012103	C8-pos	787.668	9.43
C22:1 SM	HMDB0012104*	C8-pos	785.653	9.15
C22:4 CE	HMDB0006729*	C8-pos	723.605	11.9
C22:5 CE	HMDB0010375*	C8-pos	721.589	11.61
C22:6 CE	HMDB0006733	C8-pos	719.573	11.39
C22:6 LPC	HMDB0010404	C8-pos	568.341	4.63
C22:6 LPE	HMDB0011526	C8-pos	526.293	4.64
C24:0 Ceramide (d18:1)	HMDB0004956	C8-pos	650.645	9.95
C24:0 SM	HMDB0011697	C8-pos	815.7	9.85
C24:1 Ceramide (d18:1)	HMDB0004953*	C8-pos	648.629	9.59
C24:1 SM	HMDB0012107*	C8-pos	813.685	9.47
C30:0 DAG	HMDB0007011*	C8-pos	563.465	8.54
C30:0 PC	HMDB0007869*	C8-pos	706.538	8.01
C30:1 PC	HMDB0007870*	C8-pos	704.523	7.67
C32:0 DAG	HMDB0007098*	C8-pos	591.496	8.99
C32:0 PC	HMDB0007871*	C8-pos	734.569	8.47
C32:1 DAG	HMDB0007099*	C8-pos	589.48	8.68
C32:1 PC	HMDB0007873*	C8-pos	732.554	8.17
C32:2 DAG	HMDB0007128*	C8-pos	587.465	8.38
C32:2 PC	HMDB0007874*	C8-pos	730.538	7.82
C34:0 DAG	HMDB0007100*	C8-pos	619.528	9.39
C34:0 PC	HMDB0007970*	C8-pos	762.601	8.92
C34:0 PE	HMDB0008925*	C8-pos	720.554	8.24
C34:0 PS	HMDB0012356*	C8-pos	764.547	8.05
C34:1 DAG	HMDB0007102*	C8-pos	617.512	9.11
C34:1 PC	HMDB0007972*	C8-pos	760.585	8.62
C34:1 PC plasmalogen-A	HMDB0011208*	C8-pos	746.606	8.91
C34:2 DAG	HMDB0007103*	C8-pos	615.496	8.83
C34:2 PC	HMDB0007973*	C8-pos	758.569	8.31
C34:2 PC plasmalogen	HMDB0011210*	C8-pos	744.59	8.9
C34:2 PE	HMDB0008928*	C8-pos	716.522	8.31
C34:2 PE plasmalogen	HMDB0008952*	C8-pos	702.543	8.91
C34:3 DAG	HMDB0007132*	C8-pos	613.48	8.53
C34:3 PC	HMDB0008006*	C8-pos	756.554	8.02
C34:3 PC plasmalogen	HMDB0011211*	C8-pos	742.575	8.61
C34:3 PE plasmalogen	HMDB0011343*	C8-pos	700.527	8.62
C34:4 PC	HMDB0007883*	C8-pos	754.538	7.85
C36:0 DAG	HMDB0007158*	C8-pos	647.559	9.8
C36:0 PC	HMDB0008036*	C8-pos	790.632	9.4
C36:0 PE	HMDB0008991*	C8-pos	748.585	8.65
C36:1 DAG	HMDB0007216*	C8-pos	645.543	9.53
C36:1 PC	HMDB0008038*	C8-pos	788.617	9.06
C36:1 PC plasmalogen	HMDB0011241*	C8-pos	774.635	9.35
C36:1 PE	HMDB0008993*	C8-pos	746.571	9.07
C36:2 DAG	HMDB0007218*	C8-pos	643.527	9.24
C36:2 PC	HMDB0008039*	C8-pos	786.6	8.77
C36:2 PC plasmalogen	HMDB0011243*	C8-pos	772.621	9.07
C36:2 PE	HMDB0008994*	C8-pos	744.555	8.75
C36:2 PE plasmalogen	HMDB0009082*	C8-pos	730.575	9.34
C36:3 DAG	HMDB0007219*	C8-pos	641.512	8.95
C36:3 PC	HMDB0008105*	C8-pos	784.585	8.55
C36:3 PC plasmalogen	HMDB0011244*	C8-pos	770.606	9.05
C36:3 PE	HMDB0009060*	C8-pos	742.538	8.46
C36:3 PE plasmalogen	HMDB0011441*	C8-pos	728.558	9.1
C36:4 DAG	HMDB0007248*	C8-pos	639.496	8.66
C36:4 PC-A	HMDB0007983*	C8-pos	782.569	8.14
C36:4 PC-B	HMDB0008138*	C8-pos	782.569	8.4
C36:4 PC plasmalogen	HMDB0011310*	C8-pos	768.59	8.95
C36:4 PE	HMDB0008937*	C8-pos	740.524	8.36
C36:4 PE plasmalogen	HMDB0011442*	C8-pos	726.544	8.74
C36:5 PC plasmalogen-A	HMDB0011221*	C8-pos	766.573	8.39
C36:5 PC plasmalogen-B	HMDB0011220*	C8-pos	766.573	8.62
C36:5 PE plasmalogen	HMDB0011410*	C8-pos	724.528	8.62
C38:2 PC	HMDB0008270*	C8-pos	814.632	9.14
C38:2 PE	HMDB0008942*	C8-pos	772.585	8.55
C38:3 PC	HMDB0008047*	C8-pos	812.616	8.93
C38:3 PE plasmalogen	HMDB0011384*	C8-pos	756.591	8.78
C38:4 DAG	HMDB0007170*	C8-pos	667.528	9.21
C38:4 PC	HMDB0008048*	C8-pos	810.6	8.79
C38:4 PC plasmalogen	HMDB0011252*	C8-pos	796.621	9.09
C38:4 PE	HMDB0009003*	C8-pos	768.554	8.79
C38:5 DAG	HMDB0007199*	C8-pos	665.512	8.92
C38:5 PE	HMDB0009069*	C8-pos	766.54	8.5
C38:5 PE plasmalogen	HMDB0011386*	C8-pos	752.559	9.06
C38:6 PC	HMDB0007991*	C8-pos	806.569	8.27
C38:6 PC plasmalogen	HMDB0011319*	C8-pos	792.589	8.73
C38:6 PE	HMDB0009102*	C8-pos	764.523	8.28
C38:6 PE plasmalogen	HMDB0011387*	C8-pos	750.543	8.74
C38:7 PC plasmalogen	HMDB0011229*	C8-pos	790.574	8.55
C38:7 PE plasmalogen	HMDB0011420*	C8-pos	748.528	8.55
C40:10 PC	HMDB0008511*	C8-pos	826.538	7.97
C40:6 PC	HMDB0008057*	C8-pos	834.6	8.73
C40:6 PS	HMDB0010167*	C8-pos	836.539	8.39
C40:7 PC plasmalogen	HMDB0011294*	C8-pos	818.604	8.96
C40:7 PE plasmalogen	HMDB0011394*	C8-pos	776.558	8.99
C40:9 PC	HMDB0008731*	C8-pos	828.551	8.27
C41:0 TAG	N/A	C8-pos	731.616	10.59
C42:0 TAG	HMDB0072780*	C8-pos	745.632	10.78
C43:0 TAG	HMDB0042062*	C8-pos	759.647	10.95
C43:1 TAG	HMDB0042098*	C8-pos	757.631	10.71
C44:0 TAG	HMDB0042063*	C8-pos	773.663	11.13
C44:1 TAG	HMDB0042301*	C8-pos	771.647	10.89
C44:2 TAG	HMDB0042279*	C8-pos	769.632	10.63
C45:0 TAG	HMDB0042093*	C8-pos	787.678	11.29
C45:1 TAG	HMDB0042099*	C8-pos	785.663	11.05
C45:2 TAG	HMDB0043170*	C8-pos	783.647	10.8
C46:0 TAG	HMDB0010411*	C8-pos	801.694	11.47
C46:1 TAG	HMDB0010412*	C8-pos	799.678	11.22
C46:2 TAG	HMDB0010419*	C8-pos	797.663	10.98
C46:3 TAG	HMDB0042751*	C8-pos	795.647	10.74
C46:4 TAG	HMDB0042548*	C8-pos	793.632	10.48
C47:0 TAG	HMDB0042094*	C8-pos	815.71	11.61
C47:1 TAG	HMDB0042100*	C8-pos	813.694	11.39
C47:2 TAG	HMDB0042076*	C8-pos	811.678	11.14
C48:0 TAG	HMDB0005356*	C8-pos	829.725	11.81
C48:1 TAG	HMDB0005359*	C8-pos	827.71	11.57
C48:2 TAG	HMDB0005376*	C8-pos	825.693	11.33
C48:3 TAG	HMDB0005432*	C8-pos	823.678	11.07
C48:4 TAG	HMDB0042811*	C8-pos	821.663	10.83
C48:5 TAG	HMDB0042789*	C8-pos	819.647	10.63
C49:0 TAG	HMDB0042095*	C8-pos	843.741	11.94
C49:1 TAG	HMDB0011705*	C8-pos	841.726	11.71
C49:2 TAG	HMDB0011706*	C8-pos	839.71	11.48
C49:3 TAG	HMDB0042103*	C8-pos	837.694	11.24
C50:0 TAG	HMDB0005357*	C8-pos	857.757	12.15
C50:1 TAG	HMDB0005360*	C8-pos	855.741	11.9
C50:2 TAG	HMDB0005377*	C8-pos	853.725	11.66
C50:3 TAG	HMDB0005433*	C8-pos	851.709	11.42
C50:4 TAG	HMDB0005435*	C8-pos	849.694	11.17
C50:5 TAG	HMDB0010471*	C8-pos	847.679	10.92
C50:6 TAG	HMDB0010497*	C8-pos	845.663	10.78
C51:0 TAG	HMDB0031106*	C8-pos	871.772	12.28
C51:1 TAG	HMDB0042104*	C8-pos	869.757	12.05
C51:2 TAG	HMDB0005362*	C8-pos	867.741	11.82
C51:3 TAG	HMDB0011701*	C8-pos	865.725	11.58
C52:0 TAG	HMDB0005365*	C8-pos	885.788	12.49
C52:1 TAG	HMDB0005367*	C8-pos	883.772	12.23
C52:2 TAG	HMDB0005369*	C8-pos	881.757	12
C52:3 TAG	HMDB0005384*	C8-pos	879.741	11.75
C52:4 TAG	HMDB0005363*	C8-pos	877.724	11.49
C52:5 TAG	HMDB0005380*	C8-pos	875.709	11.27
C52:6 TAG	HMDB0005436*	C8-pos	873.694	11.04
C52:7 TAG	HMDB0010517*	C8-pos	871.679	10.89
C53:2 TAG	HMDB0042196*	C8-pos	895.773	12.3
C53:3 TAG	HMDB0043058*	C8-pos	893.757	11.92
C54:10 TAG	N/A	C8-pos	893.662	9.7
C54:1 TAG	HMDB0005395*	C8-pos	911.804	12.57
C54:2 TAG	HMDB0005403*	C8-pos	909.788	12.32
C54:3 TAG	HMDB0005405*	C8-pos	907.772	12.08
C54:4 TAG	HMDB0005370*	C8-pos	905.756	11.84
C54:5 TAG	HMDB0005385*	C8-pos	903.741	11.6
C54:6 TAG	HMDB0005391*	C8-pos	901.725	11.36
C54:7 TAG	HMDB0005447*	C8-pos	899.71	11.12
C54:8 TAG	HMDB0010518*	C8-pos	897.695	11.03
C55:2 TAG	HMDB0042226*	C8-pos	923.804	12.49
C55:3 TAG	HMDB0042466*	C8-pos	921.788	12.25
C56:10 TAG	HMDB0010513*	C8-pos	921.694	11
C56:1 TAG	HMDB0005396*	C8-pos	939.836	12.95
C56:2 TAG	HMDB0005404*	C8-pos	937.816	12.67
C56:3 TAG	HMDB0005410*	C8-pos	935.804	12.41
C56:4 TAG	HMDB0005398*	C8-pos	933.788	12.16
C56:5 TAG	HMDB0005406*	C8-pos	931.772	12.04
C56:6 TAG	HMDB0005456*	C8-pos	929.756	11.81
C56:7 TAG	HMDB0005462*	C8-pos	927.741	11.61
C56:8 TAG	HMDB0005392*	C8-pos	925.725	11.38
C56:9 TAG	HMDB0005448*	C8-pos	923.711	11.15
C58:10 TAG	HMDB0005476*	C8-pos	949.726	11.29
C58:6 TAG	HMDB0005458*	C8-pos	957.788	12.06
C58:7 TAG	HMDB0005471*	C8-pos	955.772	11.93
C58:8 TAG	HMDB0005413*	C8-pos	953.757	11.71
C58:9 TAG	HMDB0005463*	C8-pos	951.741	11.46
cholesterol	HMDB0000067	C8-pos	369.352	7.22
palmithoylethanolamide	HMDB0002100	C8-pos	300.291	4.94
10-HDoHE/14-HDoHE	HMDB0060037*	C18-neg	343.228	11.55
10-heptadecenoate	HMDB0060038	C18-neg	267.233	14.35
10-nonadecenoate	HMDB0013622	C18-neg	295.264	15.34
11-HDoHE	HMDB0060040	C18-neg	343.228	11.66
11-HETE	HMDB0004682	C18-neg	319.227	11.55
12.13-diHOME	HMDB0004705	C18-neg	313.238	9.96
12-HEPE/8-HEPE	HMDB0010202*	C18-neg	317.212	10.99
12-HETE/8-HETE	HMDB0006111*	C18-neg	319.228	11.68
13-docosenoate	HMDB0002068	C18-neg	337.311	16.56
13-HDoHE	HMDB0060043	C18-neg	343.228	11.47
13-HODE	HMDB0004667	C18-neg	295.228	11.27
15-HEPE	HMDB0010209	C18-neg	317.212	10.83
15-HETE	HMDB0003876	C18-neg	319.227	11.38
15-HpETE	HMDB0004244	C18-neg	335.222	11.64
16-HDoHE/17-HDoHE	HMDB0060047*	C18-neg	343.228	11.41
16-hydroxypalmitate	HMDB0006294	C18-neg	271.228	10.79
17,18-diHETE	HMDB0010211	C18-neg	335.222	9.62
17-methylstearate	HMDB0037397	C18-neg	297.279	15.98
20-HDoHE	HMDB0060048	C18-neg	343.227	11.23
2-hydroxyhexadecanoate	HMDB0031057	C18-neg	271.228	13.49
2-hydroxyibuprofen	N/A	C18-neg	221.117	5.84
2-hydroxyoctanoate	HMDB0002264*	C18-neg	159.101	6.37
3-hydroxydecanoate	HMDB0002203	C18-neg	187.133	8.12
3-hydroxyhexanoate	N/A	C18-neg	131.07	1.45
3-hydroxyoctanoate	HMDB0001954	C18-neg	159.101	5.49
3-methyladipate	HMDB0000555	C18-neg	159.065	1.24
4-hydroxystyrene	HMDB0004072	C18-neg	119.049	2.18
5,15-diHETE	HMDB0010216	C18-neg	335.223	9.48
5,6-DHET	HMDB0002343	C18-neg	337.238	10.92
5,6-diHETE	N/A	C18-neg	335.222	10.93
5-dodecenoate	HMDB0000529	C18-neg	197.154	11.25
5-HEPE	HMDB0005081	C18-neg	317.212	11.21
5-HETE	HMDB0011134	C18-neg	319.228	11.95
7-HDoHE	HMDB0060050	C18-neg	343.228	11.76
8,15-diHETE	HMDB0010219	C18-neg	335.223	9.31
8-HDoHE	HMDB0060051	C18-neg	343.228	11.82
9,10-diHOME	HMDB0004704	C18-neg	313.238	9.77
9-cis-retinoic acid	HMDB0002369	C18-neg	299.201	12.46
9-HEPE	HMDB0060053	C18-neg	317.212	11.07
9-HETE	HMDB0010222	C18-neg	319.227	11.82
adrenate	HMDB0002226	C18-neg	331.264	14.67
alpha-linolenate	HMDB0001388	C18-neg	277.217	13.33
arachidate	HMDB0002212	C18-neg	311.295	16.57
arachidonate	HMDB0001043	C18-neg	303.233	13.91
azelate	HMDB0000784	C18-neg	187.096	3.75
C16:0 PC plasmalogen	N/A	C18-neg	526.351	12.12
caprate	HMDB0000511	C18-neg	171.138	10.53
carboxyibuprofen	N/A	C18-neg	235.097	6.05
chenodeoxycholate	HMDB0000518	C18-neg	391.285	10.14
cholate	HMDB0000619	C18-neg	407.28	8.76
cinnamoylglycine	HMDB0011621	C18-neg	204.066	3.13
deoxycholate	HMDB0000626	C18-neg	391.285	10.34
docosahexaenoate	HMDB0002183	C18-neg	327.233	13.7
docosapentaenoate	HMDB0001976	C18-neg	329.248	14.06
dodecanedioate	HMDB0000623	C18-neg	229.144	7.64
dodecanoate	HMDB0000638	C18-neg	199.169	12.15
eicosadienoate	HMDB0005060	C18-neg	307.264	15.03
eicosanedioate	N/A	C18-neg	341.269	12.83
eicosapentaenoate	HMDB0001999	C18-neg	301.217	13.22
eicosatrienoate	HMDB0002925	C18-neg	305.248	14.38
eicosenoate	HMDB0002231	C18-neg	309.28	15.75
formylmethionine	HMDB0001015	C18-neg	176.037	1.03
gamma-linolenate	HMDB0003073	C18-neg	277.217	13.45
glycochenodeoxycholate	HMDB0000637	C18-neg	448.307	8.87
glycodeoxycholate	HMDB0000631	C18-neg	448.307	9.1
glycolithocholate	HMDB0000698	C18-neg	432.312	10.45
glycoursodeoxycholate	HMDB0000708	C18-neg	448.307	7.73
heptadecanoate	HMDB0002259	C18-neg	269.248	15.25
hexadecanedioate	HMDB0000672	C18-neg	285.207	10.36
hydrocinnamate	HMDB0000764	C18-neg	149.059	5.81
hydroxymyristate	HMDB0002261	C18-neg	243.196	12.07
hyodeoxycholate/ursodeoxycholate	HMDB0000733*	C18-neg	391.285	8.89
ibuprofen	HMDB0001925	C18-neg	205.123	9.94
ketodeoxycholate	HMDB0000391	C18-neg	405.264	8
levulinate	HMDB0000720	C18-neg	115.039	0.92
linoleate	HMDB0000673	C18-neg	279.233	14.07
lithocholate	HMDB0000761	C18-neg	375.29	11.97
LTB3	N/A	C18-neg	337.238	10.39
LTB4	HMDB0001085	C18-neg	335.223	9.7
LXA4	HMDB0004385	C18-neg	351.217	8.31
mandelate	HMDB0000703	C18-neg	151.039	1.86
myristate	HMDB0000806	C18-neg	227.201	13.57
myristoleate	HMDB0002000	C18-neg	225.185	12.52
naproxen	HMDB0001923	C18-neg	229.086	8.21
nonadecanoate	HMDB0000772	C18-neg	297.279	16.13
oleate	HMDB0000207	C18-neg	281.248	14.87
oxypurinol	HMDB0000786	C18-neg	151.025	0.72
palmitate	HMDB0000220	C18-neg	255.233	14.73
palmitoleate	HMDB0003229	C18-neg	253.217	13.78
palmitoylethanolamide	HMDB0002100	C18-neg	344.28	13.28
pentadecanoate	HMDB0000826	C18-neg	241.217	14.18
PGD2	HMDB0001403	C18-neg	351.217	7.91
PGE1	HMDB0001442	C18-neg	353.233	7.79
PGE2	HMDB0001220	C18-neg	351.217	7.72
PGF2a	HMDB0001139	C18-neg	353.233	7.18
phenyllactate	HMDB0000779	C18-neg	165.054	2.18
p-hydroxyphenylacetate	HMDB0000020	C18-neg	151.039	1.32
phytanate	HMDB0000801	C18-neg	311.295	15.96
porphobilinogen	HMDB0000245	C18-neg	225.087	0.91
RvD2	HMDB0002294	C18-neg	375.218	8.02
saccharin	HMDB0029723	C18-neg	181.99	0.99
salicylate	HMDB0001895	C18-neg	137.023	2.81
stearate	HMDB0000827	C18-neg	283.264	15.7
sulfamethoxazole	HMDB0015150	C18-neg	252.044	3.13
tauro-alpha-muricholate/tauro-beta-muricholate	HMDB0000932	C18-neg	514.284	6.12
taurochenodeoxycholate	HMDB0000951	C18-neg	498.289	8.1
taurodeoxycholate	HMDB0000896	C18-neg	498.289	8.38
taurohyodeoxycholate/tauroursodeoxycholate	HMDB0000874	C18-neg	498.289	7.06
tetradecanedioate	HMDB0000872	C18-neg	257.175	9.05
undecanedionate	HMDB0000888	C18-neg	215.128	6.82
urobilin	HMDB0004159	C18-neg	593.334	6.19
*Listed HMDB ID is a representative ID due to uncertainty in the precise chemical structure
